# Supplementary material for: An acoustofluidic device for efficient mixing over a wide range of flow rates
Source: Royal Society of Chemistry journal article supplement (doi:10.1039/c9lc01171d), 2020-01-01
Supplement: c9lc01171d1.pdf [file c9lc01171d1.pdf]

Supplementary Material (ESI) for Lab on a Chip  
This journal is © The Royal Society of Chemistry 2020

## An Acoustofluidic device for efficient mixing over a wide range of flow rates

Hunter Bachman,<sup>a</sup> Chuyi Chen,<sup>a</sup> Joseph Rufo,<sup>a</sup> Shuaiguo Zhao,<sup>a</sup> Shujie Yang,<sup>a</sup> Zhenhua Tian,<sup>b</sup> Nitesh Nama,<sup>c</sup> Po-Hsun Huang,<sup>\*a</sup> and Tony Jun Huang<sup>\*a</sup>

<sup>a</sup> Department of Mechanical Engineering and Material Science, Duke University, Durham NC, 27708 USA. Tel: 919-684-5728; E-mail: [phhuang73@gmail.com](mailto:phhuang73@gmail.com) and [tony.huang@duke.edu](mailto:tony.huang@duke.edu)

<sup>b</sup> Department of Aerospace Engineering, Mississippi State University, Starkville, MS, 39762, USA

<sup>c</sup> Department of Surgery, University of Michigan, Ann Arbor, MI 48109, USA

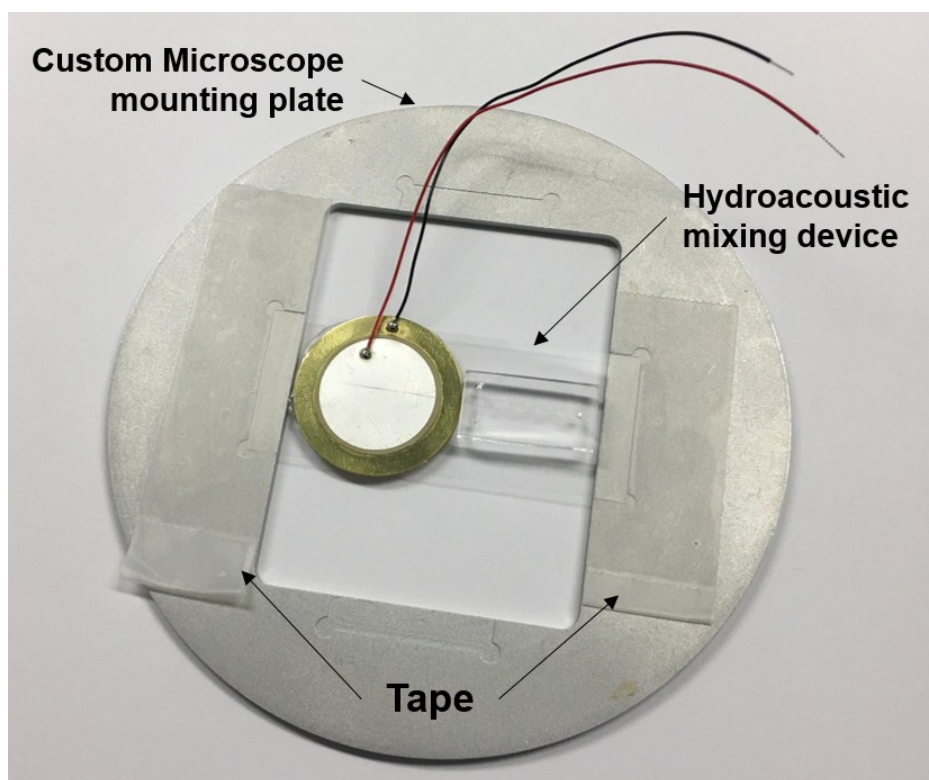

**Fig. S1** Photo of an acoustofluidic mixing device mounted onto the customized microscope mounting plate that ensures consistent alignment. The device is secured to the plate using standard single-sided tape which absorbs the waves that propagate out from the transducer and reduces reflection.

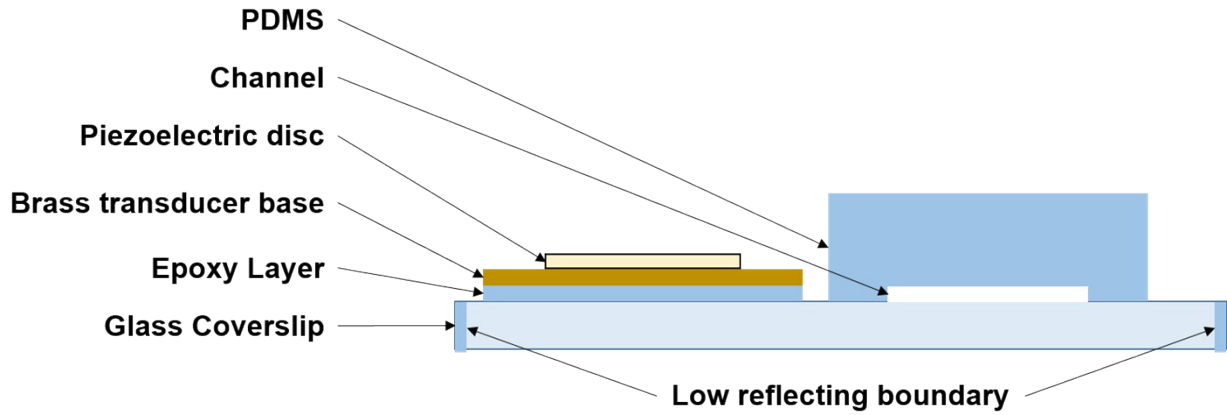

**Fig. S2** Schematic of the acoustofluidic mixing device model built in COMSOL Multiphysics®. Model is not to scale.

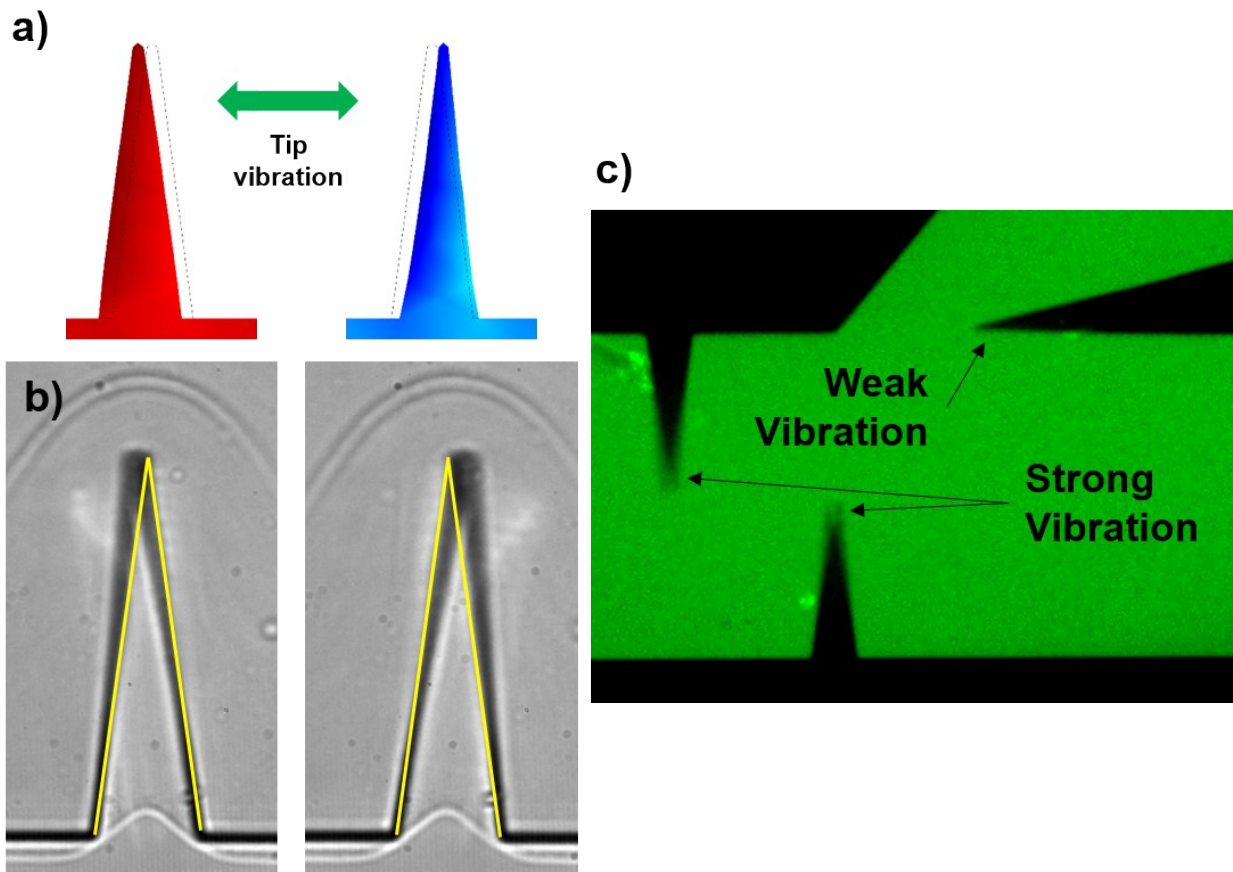

**Fig. S3** a) Simulation results and b) microscope images for sharp-edge tip vibration generated by the propagating waves on the glass substrate. c) Experimental comparison of sharp-edge versus modified Tesla structure tip vibration.

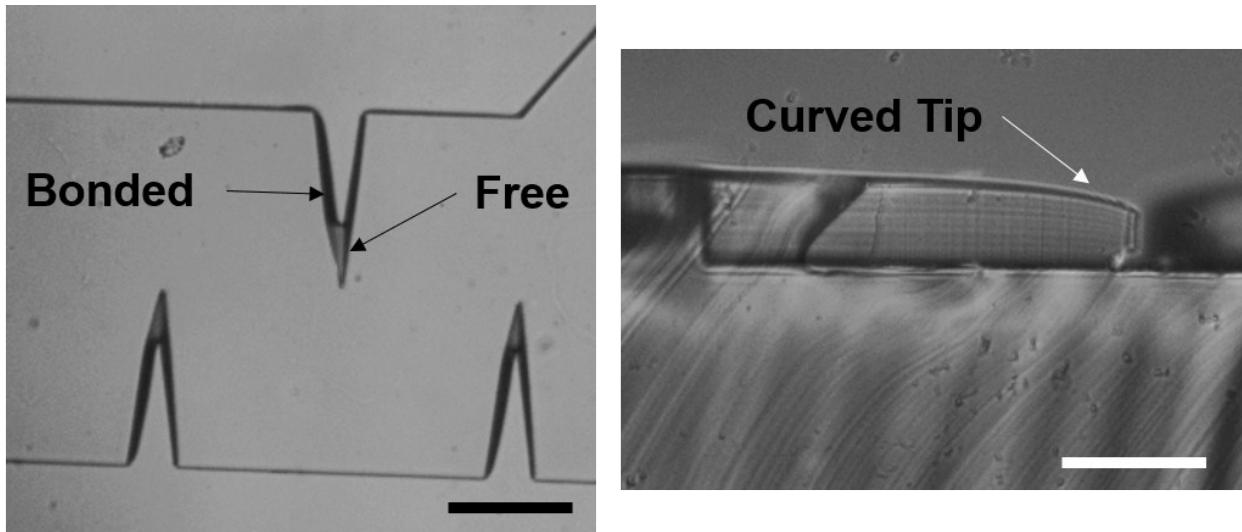

**Fig. S4** (Left) Image of an unfilled mixing channel showing that the ends of the sharp-edges have come free from the glass substrate and are not pressed in contact with the surface. (Right) Side view of a sharp-edge tip showing the curved tip formed during DRIE. We hypothesize that these curved tips and strong acoustic vibrations encourage the sharp-edges to come free from the glass substrate and create larger vibration amplitudes. Scale bars: 200  $\mu\text{m}$ .

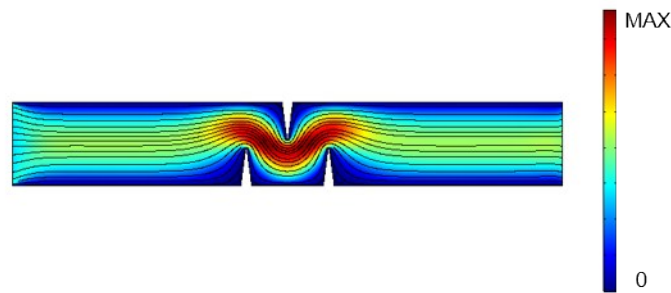

**Fig. S5** Simulation result showing the relative flow profile utilized to explore the effectiveness of acoustic mixing at various flow rates. The zero order solution of the COMSOL model solved for the Stoke's flow, yielding velocity profiles that were nearly identical for the various flow rates. A representative plot for the velocity in the channel is provided here. The maximum velocity magnitudes (red areas) for the 20, 400, and 2,000  $\mu\text{L}/\text{min}$  simulations were approximately  $7.5\text{e-}3$ ,  $150\text{e-}3$  and  $750\text{e-}3$  m/s, respectively.

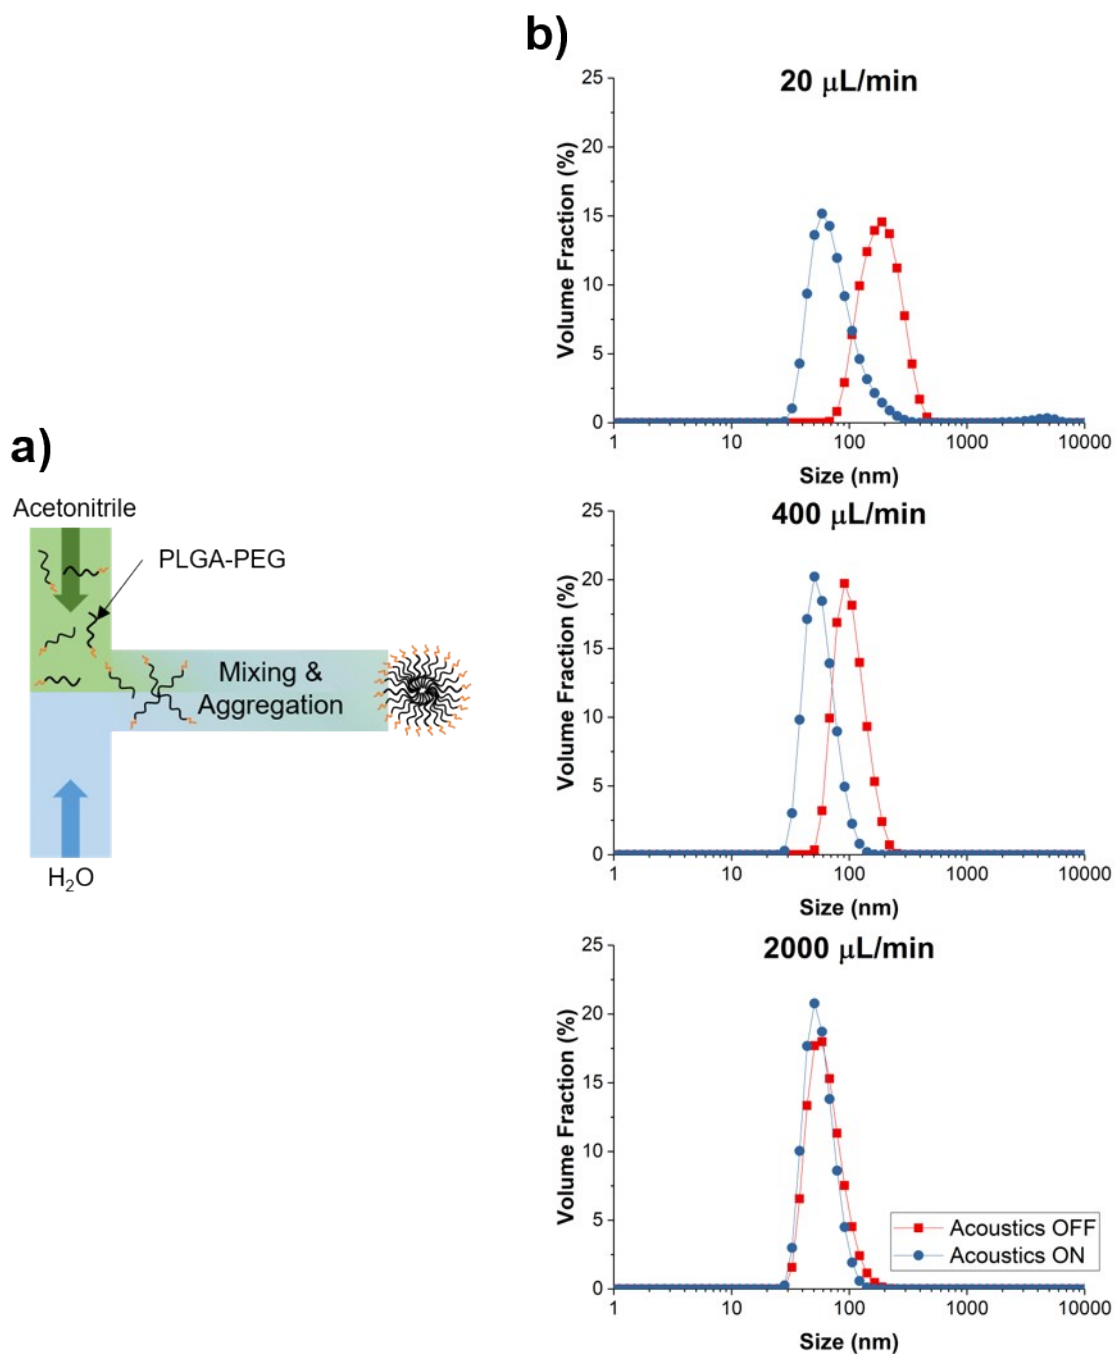

**Fig. S6** a) Schematic detailing the mechanism for PLGA-PEG nanoparticle generation. b) Plots of the sizes of nanoparticles generated at various flow rates with the acoustics OFF and ON. Similar to the mixing performance, the size of the nanoparticles generated with/without acoustic mixing became closer as the flow rate increased and the hydrodynamic mixing effect became more prevalent.

**Table S1.** Summary of material properties used for analysis and simulation.

|       | $\rho$ (kg/m <sup>3</sup> ) | E (GPa) | $\nu$ | Thickness ( $\mu\text{m}$ ) |
|-------|-----------------------------|---------|-------|-----------------------------|
| Glass | 2230                        | 63.0    | 0.2   | 150                         |
| Epoxy | 1290                        | 1.02    | 0.4   | 40                          |
| Brass | 8490                        | 106     | .318  | 30                          |
| PDMS  | 970                         | 750e-6  | .49   | 3e3                         |
| PZT   | 7500                        | *       | *     | 23                          |

\* Elasticity and coupling matrix taken from COMSOL and integrated into piezoelectric module

**Video S1:** Side by side video showing the vibrometer (left) and simulated (right) wave profile simultaneously.
